# Supplementary material for: Climate variability and human impact in South America during the last 2000 years: synthesis and perspectives from pollen records
Source: Copernicus journal article supplement (doi:10.5194/cp-12-483-2016), 2016-02-29
Supplement: Supplementary file 2 [file cp-12-483-2016-supplement.zip]

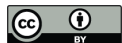

## *Supplement of*

# **Climate variability and human impact in South America during the last 2000 years: synthesis and perspectives from pollen records**

**S. G. A. Flantua et al.**

*Correspondence to:* S. G. A. Flantua ([s.g.a.flantua@uva.nl](mailto:s.g.a.flantua@uva.nl)) and H. Hooghiemstra ([h.hooghiemstra@uva.nl](mailto:h.hooghiemstra@uva.nl))

- [cp-12-483-2016-supplement-title-page.pdf](#)
- [Supplementary Information.pdf](#)
- [cp-2015-85-Table3\\_final.xlsx](#)

The copyright of individual parts of the supplement might differ from the CC-BY 3.0 licence.
